# Supplementary material
Source: PubMed Central journal article supplement (PMC3172807)

**Care and handling of mice.** Both *Anxa2*<sup>+/+</sup> and *Anxa2*<sup>-/-</sup> mice were bred in ventilated shoebox cages with bedding of aspen shavings. All mice were fed with irradiated rodent diet 20 (PicoLab) and kept in a pathogen-free room equipped with Thoren ventilation, 12h/12h light/dark cycle, and constant temperature setting at 70°F. Pairs of mice were set for breeding in individual cages and adult males were removed after the pups were born.

For high oxygen treatment, P7 mouse pups together with their dam were placed in a BioSpherix ProOX A chamber equipped with ProOx P110 single setpoint oxygen controller, E702 oxygen sensor, and ProCo2 carbon dioxide sensor for 5 consecutive days (P7-P12). The ambient oxygen level was maintained at 75 ± 2%, while all other conditions, including housing, diet, cages and bedding, were the same as for the control pups maintained in room air as described above. On P12, the mice were returned to room air (21% O<sub>2</sub>). At P17, the mouse pups were either sacrificed by CO<sub>2</sub> or anesthetized with avertin (0.5 mg/g body weight) for either retina isolation or intracardial perfusion, respectively. Body weights of pups were approximately 5 ± 1 g at P17. *Anxa2*<sup>+/+</sup> and *Anxa2*<sup>-/-</sup> mice exhibited no significant differences in body mass during the course of the experiments. Mouse retinas were isolated and assayed by immunoblot, RT-PCR, qRT-PCR, immunostaining, and ELISA on days 2-6 post-hyperoxia (P14-P18). Each experimental group contained 3 to 6 pups without gender preference.

**Table S1. List of primers****REVERSE-TRANSCRIPTION PCR (RT-PCR)**

| <b>Murine Gene</b>                                                                                       | <b>Primer sequence</b> |                                  |
|----------------------------------------------------------------------------------------------------------|------------------------|----------------------------------|
| <i>Anxa2</i>                                                                                             | Sense                  | 5'-CAAAATGTCTACTGTCCACGAAATC-3'  |
|                                                                                                          | Antisense              | 5'-ACCGTCATCCCCACCCACACAGGTAC-3' |
| <i>S100a10</i>                                                                                           | Sense                  | 5'-TCAAATGCCATCCCAAATGG-3'       |
|                                                                                                          | Antisense              | 5'-TCGACCTATTTCTTCCCCTTCTGC-3'   |
| <i>Gapdh</i>                                                                                             | Sense                  | 5'-CCTTCATTGACCTCAACTAC-3'       |
|                                                                                                          | Antisense              | 5'-TCATACTTGGCAGGTTTCTC-3'       |
| <i>Cdh5</i>                                                                                              | Sense                  | 5'-GGGAATGTGCTTGCCTATGAGAG-3'    |
|                                                                                                          | Antisense              | 5'-ACGTTGATGGTGACCATGGC-3'       |
| <i>Hif1a</i>                                                                                             | Sense                  | 5'-CAAGAAACGACCGCTGCTAAGGCC-3'   |
|                                                                                                          | Antisense              | 5'-TCTCATCCATTGACTGCCCC-3'       |
| <i>Actb</i>                                                                                              | Sense                  | 5'-AGAGGGAAATCGTGCGTGAC-3'       |
|                                                                                                          | Antisense              | 5'-CAATAGTGATGACCTGGCCCGT-3'     |
| <i>Hif1a</i> ( exon 2) (for <i>Hif1a</i> <sup>+/+</sup> and <i>Hif1a</i> <sup>-/-</sup> MEFs genotyping) |                        |                                  |
|                                                                                                          | Sense                  | 5'-ACTGGCTGCTATTGGGCGAAGTG-3'    |
|                                                                                                          | Antisense              | 5'-GTAAAGCACGAGGAAGCGGTCAG-3'    |

**Human Gene**

|                | <b>Primer sequence</b> |                              |
|----------------|------------------------|------------------------------|
| <i>ANAX2</i>   | Sense                  | 5'-CTCTACACCCCAAGTGCAT-3'    |
|                | Antisense              | 5'-TCAGTGCTGATGCAAGTTCC-3'   |
| <i>ACTB</i>    | Sense                  | 5'-CAAGAGATGGCCACGGCTGCT-3'  |
|                | Antisense              | 5'-TCCTTCTGCATCCTGTCGGCA-3'  |
| <i>HIF1A</i>   | Sense                  | 5'-CTTCTGGATGCTGGTGATTTGG-3' |
|                | Antisense              | 5'-TTTGATGGGTGAGGAATGGG-3'   |
| <i>S100A10</i> | Sense                  | 5'-AAATTCGCTGGGGATAAAGG-3'   |
|                | Antisense              | 5'-AGCCCACTTTGCCATCTCTA-3'   |

**QUANTITATIVE REAL-TIME PCR (qRT-PCR) FOR MURINE GENES (T<sub>m</sub> Used 60°C)**

|                |           |                                             |
|----------------|-----------|---------------------------------------------|
| <i>Anxa2</i>   | Sense     | 5'-ACCAACTTCGATGCTGAGAG-3'                  |
|                | Antisense | 5'-GCTCCTTTTTGGTCCTTCTC-3'                  |
| <i>S100a10</i> | Sense     | NA (SABiosciences, Cat. No.: PPM05269E-200) |
|                | Antisense | NA (SABiosciences, Cat. No.: PPM05269E-200) |
| <i>Hif1a</i>   | Sense     | 5'-TCTGGAAGGTATGTGGCATT-3'                  |
|                | Antisense | 5'-AGGGTGGGCAGAACATTTAT-3'                  |
| <i>Actb</i>    | Sense     | 5'-AAGAGCTATGAGCTGCCTGA-3'                  |
|                | Antisense | 5'-TACGGATGTCAACGTCACAC-3'                  |

**Table S2. Antibodies and reagents****A. ANTIBODIES****Primary Antibodies**

| <b>Antigen</b>                               | <b>Catalog No.</b> | <b>Isotype</b> | <b>Clone (if monoclonal)</b> | <b>Manufacturer</b>       |
|----------------------------------------------|--------------------|----------------|------------------------------|---------------------------|
| Actin                                        | sc-8422            | Mouse IgG      | C-2                          | Santa Cruz                |
| Annexin A2                                   | Mar-00             | Mouse IgG1     | ZO14                         | Zymed                     |
| Annexin A2                                   | 610068             | Mouse IgG1     | 5                            | BD Biosciences            |
| Annexin A2 light chain (p11), human          | 610070             | Mouse IgG1     | 148                          | BD Biosciences            |
| Annexin A6                                   | Sc-11388           | Rabbit IgG     |                              | Santa Cruz                |
| CD31                                         | Ab24590            | Mouse IgG1     | P2B1                         | Abcam                     |
| CD47                                         | sc-7057            | Rabbit IgG     |                              | Santa Cruz                |
| Fibrinogen                                   | A008002            | Rabbit IgG     |                              | DAKO                      |
| GFP                                          | NB600-303          | Rabbit IgG     |                              | Novus                     |
| HIF-1 $\beta$                                | NB100-133          | Rabbit IgG     |                              | Novus                     |
| HIF-1a, human                                | 610958             | Mouse IgG1     | 54                           | BD Biosciences            |
| HIF-1a, mouse                                | NB100-105          | Mouse IgG2b    | H1alpha67                    | Novus                     |
| Isotype control                              | MAB002             | Mouse IgG1     | 11711                        | R&D systems               |
| Isotype control                              | M5534              | Mouse IgG2b    | MOPC-141                     | Sigma                     |
| p11, mouse                                   |                    | Rabbit IgG     |                              | Covance Research Products |
| Pan-Cadherin                                 | 4068S              | Rabbit IgG     |                              | Cell Signaling Technology |
| Phospho-tyrosine (sepharose bead conjugated) | 9419               | Mouse IgG1     |                              | Cell Signaling Technology |
| Phospho-Src (Tyr 416)                        | 2101               | Rabbit IgG     |                              | Cell Signaling Technology |
| Phospho-VEGFR2 (Tyr 1175)                    | 2478               | Rabbit IgG     |                              | Cell Signaling Technology |
| Phosph-p44/42 (Thr202/Tyr204)                | 9101               | Rabbit IgG     |                              | Cell Signaling Technology |
| Src                                          | 2110               | Mouse IgG      | L4A1                         | Cell Signaling Technology |
| VE-cadherin 5 (PE-conjugated)                | 560410             | Mouse IgG1     | 55-7H1                       | BD Pharmingen             |
| Vincullin                                    | 05-386             | Mouse IgG1     | V284                         | Millipore                 |

## Secondary antibodies

| Antigen    | Catalog No. | Conjugates      | Host       | Manufacturer           |
|------------|-------------|-----------------|------------|------------------------|
| Mouse IgG  | A21235      | Alexa Fluor 647 | Goat IgG   | Invitrogen             |
| Mouse IgG  | AP124R      | Rhodamine       | Goat IgG   | Millipore              |
| Rabbit IgG | 711-165-152 | Cy3             | Donkey IgG | Jackson Immunoresearch |
| Mouse IgG  | NXA931      | HRP             | Sheep IgG  | GE Healthcare          |
| Goat IgG   | Sc-2020     | HRP             | Donkey IgG | Santa Cruz             |
| Rabbit IgG | NA9340      | HRP             | Donkey IgG | GE Healthcare          |

## B. Other reagents

| Name                                      | Catalog No. | Manufacturer                |
|-------------------------------------------|-------------|-----------------------------|
| 0.5 M Tris buffer (pH 6.8)                | 161-0799    | Biorad                      |
| 1.5 M Tris buffer (pH 8.8)                | 161-0798    | Biorad                      |
| 7-amino-actinomycin D (7-AAD)             | 559925      | BD Biosciences              |
| Actinomycin D                             | A5156       | Sigma                       |
| Ancrod                                    | 74/581      | NIBSC                       |
| BCA protein assay reagent A               | 23223       | Thermo Scientific           |
| BCA protein assay reagent B               | 23224       | Thermo Scientific           |
| Chromatin immunoprecipitation kit         | 17-371      | Millipore                   |
| DH5a                                      | 18265-017   | Invitrogen                  |
| dNTP set (100 mM)                         | 201912      | Qiagen                      |
| Endothelial cell growth factor (100x)     | E9640       | Sigma                       |
| Endothelial cell growth supplement (ECGS) | E2759       | Sigma                       |
| EZ-link Sulfo-NHS-SS-Biotin               | 21331       | PIERCE                      |
| Fluoromount G                             | 19784-25    | Eletron Microscopy Sciences |
| H-D-Val-Leu-Lys-AMC acetate salt          | I-1390      | Brchem                      |
| Heparin sodium salt                       | H3393       | Sigma                       |
| Immunopure Immobilized Streptavidin       | 20347       | PIERCE                      |
| Isolectin B4, Fluorescein-conjugated      | FL-1201     | Vector Laboratories         |
| Isolectin B4, Rhodamine-conjugated        | FL-1102     | Vector Laboratories         |
| L-glutamine                               | 25-005-CI   | Mediatech                   |
| Luciferase assay system                   | E4050       | Promega                     |
| Mouse Fibrinogen ELISA kit                | MFBGNKT     | Innovative Research         |
| Mouse lys-Plasminogen                     | 404         | American Diagnostica Inc.   |

|                                                                    |           |                     |
|--------------------------------------------------------------------|-----------|---------------------|
| M.O.M. kit for detecting mouse primary antibodies in mouse tissues | BMK-2202  | Vector Laboratories |
| Mouse PIGF-2 ELISA kit                                             | MP200     | R & D systems       |
| Mouse VEGF ELISA kit                                               | MMV00     | R & D systems       |
| Nuclear Extraction Kit                                             | 78833     | Thermo Scientific   |
| One-step RT-PCR kit                                                | 210212    | Qiagen              |
| PAGEr Precast Gels (10% TBE gels)                                  | 59529     | Lonza               |
| Protease inhibitor cocktail tablet (EDTA-free)                     | 10946900  | Roche               |
| QuantiTect Reverse Transcription kit                               | 205311    | Qiagen              |
| Recombinant human EPO                                              | 287-TC    | R & D Systems       |
| Recombinant mouse VEGF                                             | 493-MV    | R & D Systems       |
| Slide-A-lyzer dialysis cassette                                    | 66130     | PIERCE              |
| SYBR Green PCR master mix                                          | 4309155   | Applied Biosystems  |
| TEMED (N, N, N', N'-Tetra-methylethylenediamine)                   | 161-0801  | Biorad              |
| Trizol                                                             | 15596-026 | Invitrogen          |
| Tween 20                                                           | P1379     | Sigma               |

**Figure S1.** VEGF-A and placental growth factor (PIGF) are increased in mouse retinas during oxygen-induced retinopathy (OIR). (A) ELISA of VEGF-A and PIGF-2 levels in retinas collected between P12 and P18 from *Anxa2*<sup>+/+</sup> and *Anxa2*<sup>-/-</sup> mice treated with room air or hyperoxia (n = 3; \*\*p<0.01). (B) ELISA of VEGF-A levels in different organs and tissues of *Anxa2*<sup>+/+</sup> and *Anxa2*<sup>-/-</sup> mice at P17 following room air or hyperoxia (n = 3; \*\*p<0.01).

**Figure S2.** *Anxa2*<sup>+/+</sup> and *Anxa2*<sup>-/-</sup> mice maintained at room air (RA) show a similar pattern of retinal vascularization. (A) Representative images of whole-mount, isolectin B4-stained retinas collected at P17 from *Anxa2*<sup>+/+</sup> and *Anxa2*<sup>-/-</sup> mice maintained in RA. (B) Representative cross-sections (40x) and close-up views (200x) of retinal sections stained with DAPI (blue) and isolectin B4 (green). Sections were obtained at P17 from *Anxa2*<sup>+/+</sup> and *Anxa2*<sup>-/-</sup> mice maintained at RA. Scale bars, 200  $\mu$ m (A), 500  $\mu$ m (B, 40x), 100  $\mu$ m (B, 200x). The data are representative of five independent experiments.

**Figure S3.** HIF-1 $\alpha$  and p11 steady state mRNA expression, and the human A2 promoter region sequence. (A) qRT-PCR analysis of the fold change in HIF-1 $\alpha$  mRNA levels in retinas from P12-P18 *Anxa2*<sup>+/+</sup> mice either maintained at room air or following 5 days of hyperoxia. (B) qRT-PCR analysis of relative p11 and HIF-1 $\alpha$  mRNA levels in P16 retinas from *Anxa2*<sup>-/-</sup> mice either maintained at room air or following 4 days of hyperoxia (O<sub>2</sub>). (C) A putative HIF-1 $\alpha$  binding site (red) was identified in human A2 promoter at 378 to 373 bp upstream of the translation initiation site (green). The transcription initiation site is shown in blue. The data in A and B are representative of three independent experiments.

**Figure S4.** A2 mRNA stability is not affected by hypoxia. (A) RT-PCR and immunoblot (IB) analyses of HIF-1 $\alpha$  and A2 mRNA and protein levels in HUVECs pretreated with or without

actinomycin D (10 µg/ml, 6h), followed by CoCl<sub>2</sub> (200 µM) for the indicated time periods. (B) Representative immunoblot analysis of HIF-1α and HIF-1β expression in HEK 293 cells 24h after transfection with HIF-1α (pcDNA3.1-hif1a-CMV) and HIF-1β (pBM5/hif1b-CMV) expression vectors. The data are representative of three independent experiments (A and B).

**Figure S5.** A2 deficiency does not affect HIF-1α expression. (A) Representative immunoblot (IB) and RT-PCR analyses HIF-1α and A2 in P17 retinas from both *Anxa2*<sup>+/+</sup> and *Anxa2*<sup>-/-</sup> mice maintained in room air (RA) or treated with hyperoxia (O<sub>2</sub>). (B) Representative immunoblot and RT-PCR analyses of HIF-1α in *Anxa2*<sup>+/+</sup> and *Anxa2*<sup>-/-</sup> mouse CMECs after treatment with CoCl<sub>2</sub> (200 µM, 16h). The data are representative of three independent experiments (A and B).

**Figure S6.** Annexin A2 reduces fibrin deposition in mouse retinas. (A) Representative cross-sections (40x), with a higher power view of the peripheral region (200x), of P17 retinas from *Anxa2*<sup>+/+</sup> and *Anxa2*<sup>-/-</sup> mice maintained at RA. The sections were stained with DAPI (blue), isolectin B4 (green), and anti-fibrinogen (red). S, scleral side; V, vitreal side. (B) Representative immunoblot analysis of fibrin levels in P17 retinas from *Anxa2*<sup>+/+</sup> and *Anxa2*<sup>-/-</sup> mice maintained in room air (RA). Scale bars, 500 µm (A, 40x), 100 µm (A, 200x). The data are representative of five (A) or three (B) independent experiments.

**Figure S7.** Ancrod fails to increase retinal neo-angiogenesis in *Anxa2*<sup>+/+</sup> neonatal mice. (A) ELISA of fibrinogen levels (1.17 ± 0.07 vs. 0.24 ± 0.032 mg/ml; n = 6 and n = 4, respectively) in plasma of P17 post-hyperoxic *Anxa2*<sup>+/+</sup> mice treated with or without ancrod. (B) Representative cross-sections (40x), with higher power view of the peripheral region (200x), from P17 post-hyperoxic *Anxa2*<sup>+/+</sup> mice treated with or without ancrod were stained with DAPI (blue), isolectin B4 (green), and anti-fibrinogen (red). S, scleral side; V, vitreal side. (C) Representative immunoblot analysis of retinal fibrin levels in P17 post-hyperoxic *Anxa2*<sup>+/+</sup> mice treated with or without ancrod. (D) Representative images of retinas showing total retinal area and regions of

vaso-occlusion and neovascularization in P17 post-hyperoxic *Anxa2<sup>+/+</sup>* mice treated with or without ancred. Pixel numbers for each compartment are indicated below each image. (E) Ratios of vaso-obliterative to total retinal area ( $22.4 \pm 0.34\%$  vs.  $23.6 \pm 0.99\%$ ) and neovascular to total retinal area ( $12.1 \pm 0.86\%$  vs.  $13.5 \pm 0.32\%$ ) in P17 post-hyperoxic *Anxa2<sup>+/+</sup>* mice treated with or without ancred treatment ( $n = 4$ ; NS, no significant difference). (F) Enumeration of neovascular nuclei in retinal sections from P17 post-hyperoxic *Anxa2<sup>+/+</sup>* mice treated with ( $208.8 \pm 12.6$ ) or without ancred ( $183.5 \pm 4.2$ ) ( $n = 4$ ; NS: no significant difference). Scale bars, 200  $\mu\text{m}$  (B, 50x), 500  $\mu\text{m}$  (D, 40x), 100  $\mu\text{m}$  (D, 200x). The data are representative of five (B) or three (C) independent experiments.

**Figure S8.** Retinal neo-angiogenesis decreases in *Anxa2<sup>-/-</sup>* mice after treatment with tranexamic acid (TA). (A) Plasma clotting time and tPA-dependent clot lysis time for plasma samples from posthyperoxic *Anxa2<sup>-/-</sup>* mice after treatment with ( $n = 4$ ) or without ( $n = 4$ ) TA at P17. (B) Representative retinal cross-sections (4x), with close-up view of the peripheral region (200x), were stained with DAPI (blue), isolectin (green) and anti-fibrin (red) from P17 *Anxa2<sup>-/-</sup>* mice treated with or without TA post-hyperoxia. S, scleral side; V, vitreal side. (C) Representative immunoblot analysis of fibrin level in P17 post-hyperoxic retinas from *Anxa2<sup>-/-</sup>* mice treated with or without TA. (D) Images of representative retinas showing total retinal area, and regions of vaso-obliteration and neovascularization in P17 post-hyperoxic *Anxa2<sup>-/-</sup>* mice with or without TA treatment. Pixel number corresponding to each compartment is indicated below each image. (E) Ratios of vaso-obliteration to total retinal area ( $13.8 \pm 2.3$  vs  $18.5 \pm 2.5\%$ ) and neovascular to total retinal area ( $5.9 \pm 0.5$  vs  $3.9 \pm 0.2$ ) in P17 post-hyperoxic *Anxa2<sup>+/+</sup>* mice treated with or without TA ( $n = 3$ ). NS, no significant difference; \*  $p < 0.05$ ). (F) Enumeration of neovascular nuclei in retinal sections from P17 post-hyperoxic *Anxa2<sup>-/-</sup>* mice treated with ( $68.5 \pm 5.5$ ) or without ( $92.8 \pm 5.9$ ) TA ( $n = 4$ , \*  $p < 0.05$ ). Scale bars, 500  $\mu\text{m}$  (B, 40x), 100  $\mu\text{m}$  (B, 200x), 200  $\mu\text{m}$  (D, 50x). The data are representative of five (B) or three (C) independent experiments.



**Figure S9.** Working model of retinal angiogenesis by A2 during oxygen-induced retinopathy (OIR). (A) Hypoxia stabilizes HIF-1 $\alpha$  protein, preventing its proteasomal degradation. (B) Stabilized HIF-1 $\alpha$  translocates into the cell nucleus, heterodimerizing with HIF-1 $\beta$ . (C) HIF-1 $\alpha$ /HIF-1 $\beta$  complexes bind to the hypoxia-responsive element (HRE) within the A2 promoter, initiating transcription of A2 mRNA. (D) Newly synthesized A2 protein recruits and stabilizes p11 to form the A2 heterotetramer, which associates with the inner leaflet of the plasma membrane. (E) Hypoxia also activates Src kinase (F), which in turn phosphorylates the A2 heterotetramer at residue Tyr<sup>23</sup> on A2. (G) The A2 heterotetramer translocates to the cell surface, where it binds both plasminogen (PLG) and tPA (H), stimulating the production of plasmin. (I) Plasmin degrades pericellular fibrin (J), which facilitates directed migration of vascular endothelial cells (K), promoting retinal angiogenesis. Modulation of retinal fibrin deposition by either reducing fibrinogen content (ancrod) or inhibiting plasminogen activation (TA) will influence retinal neo-angiogenesis during OIR.

Figure S1

A

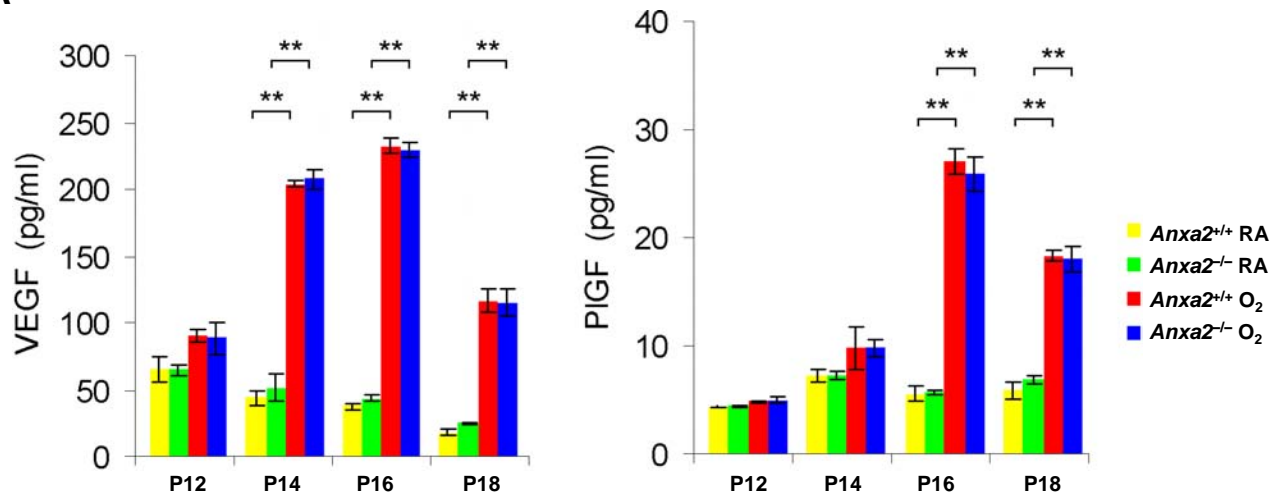

B

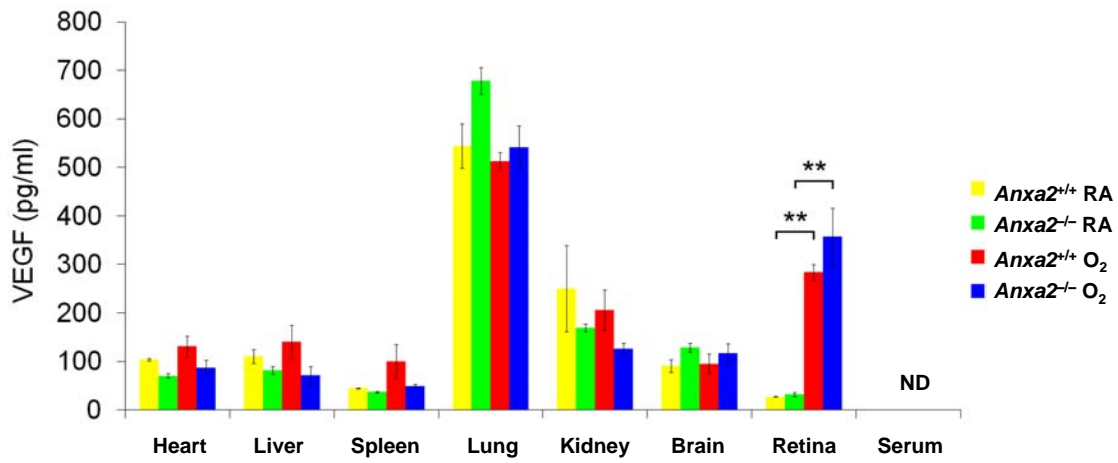

Figure S2

A

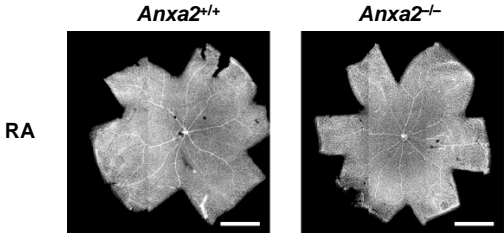

B

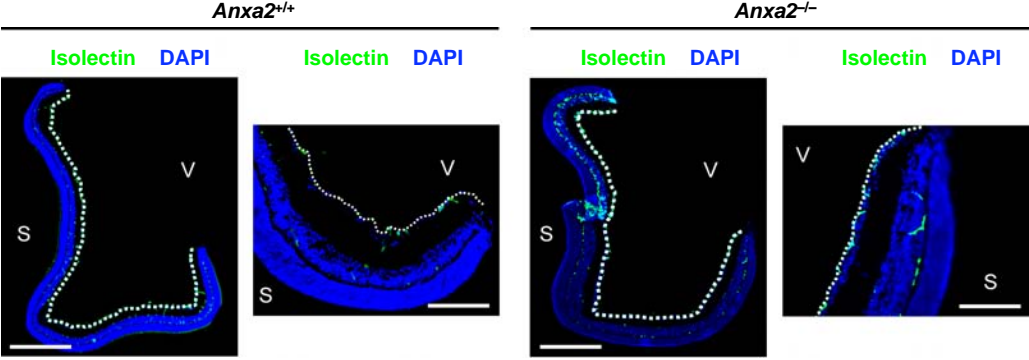

**Figure S3**

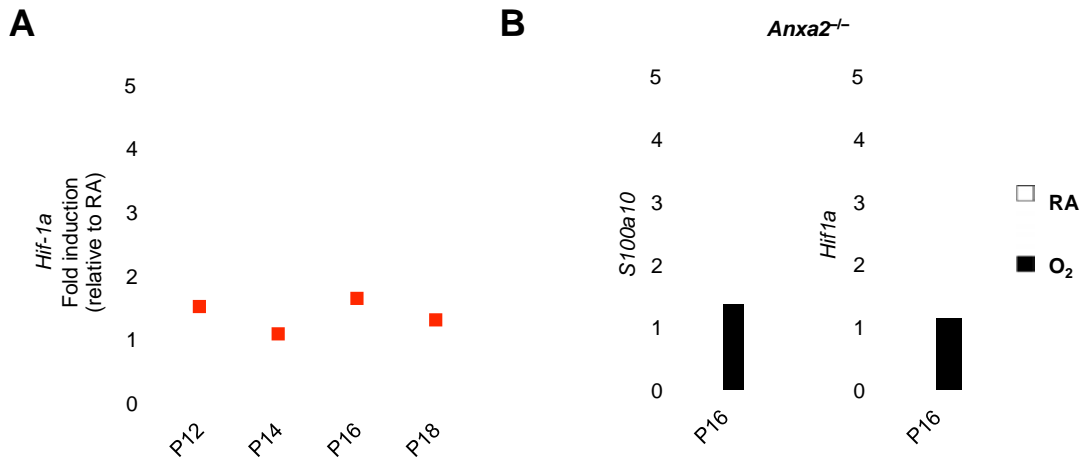

**C**

**Human A2 promoter region**

5'- CCACTTAATCAAGCCCAGAGTCTACTACTAAAGTCTTGTTAATTTATTAA  
-378 -373

CCCAAGCCGAGGCTGAGAGCTCGACGTGGCACTTAAGAAGTAAAATGAGG  
 Putative HIF-1 $\alpha$  binding site

AAAGGAGGAAGAAACGGGGTCCCTGTGGGCCTCGGGGCAGCCTCGGCCGG

GCTTTCTCGGAGGGCAGGGCCAGGGGCGCTGGGGCCGCTCCCGCTGGCG

CGGCTCGGAGCGTTCCAGGGCGCGTCCCTGCGGGCCGGCGGGCCGGGG

TGAGTCACCCCTGACTTGGGGTGGGAGCGGGCCGTGTAAGGGGAGGCGG

GGCGGGCGGGGCGGGCCCTCCCTCGCCTAGGGAGGATGTGGCGGGTATA  
-73 -68

AAAGCCCCACCCAGCCAGCCGGCTCTGCTCAGCATTGGGGACGCTCTC  
 Transcription initiation site

AGCTCTCGGCGCACGGCCAGGTAAGCGGGCGGCCCTGCCCGCCCGG  
+1

ATGGGCCGCCAGCTAGCGG-3'  
 Translation initiation site

# Figure S4

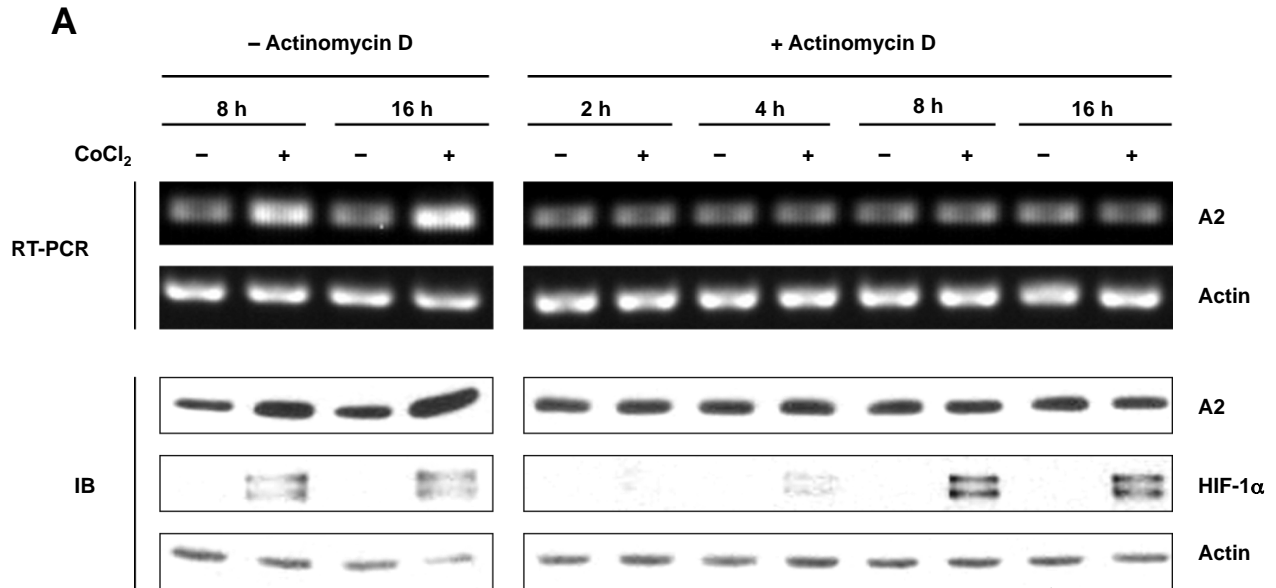

## B

293 cell nuclear extract

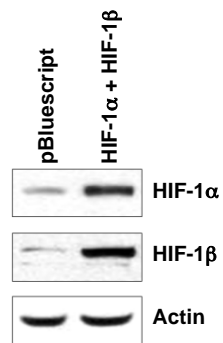

Figure S5

A

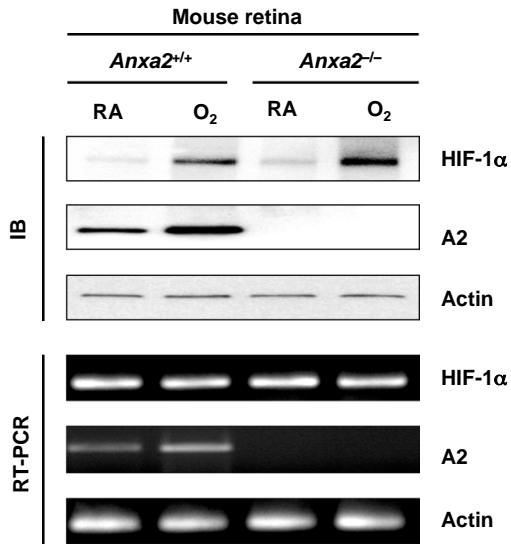

B

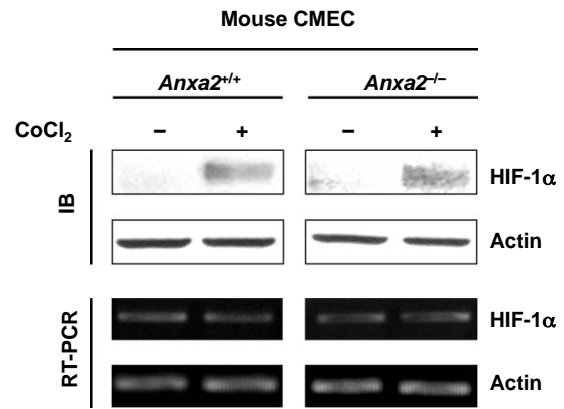

Figure S6

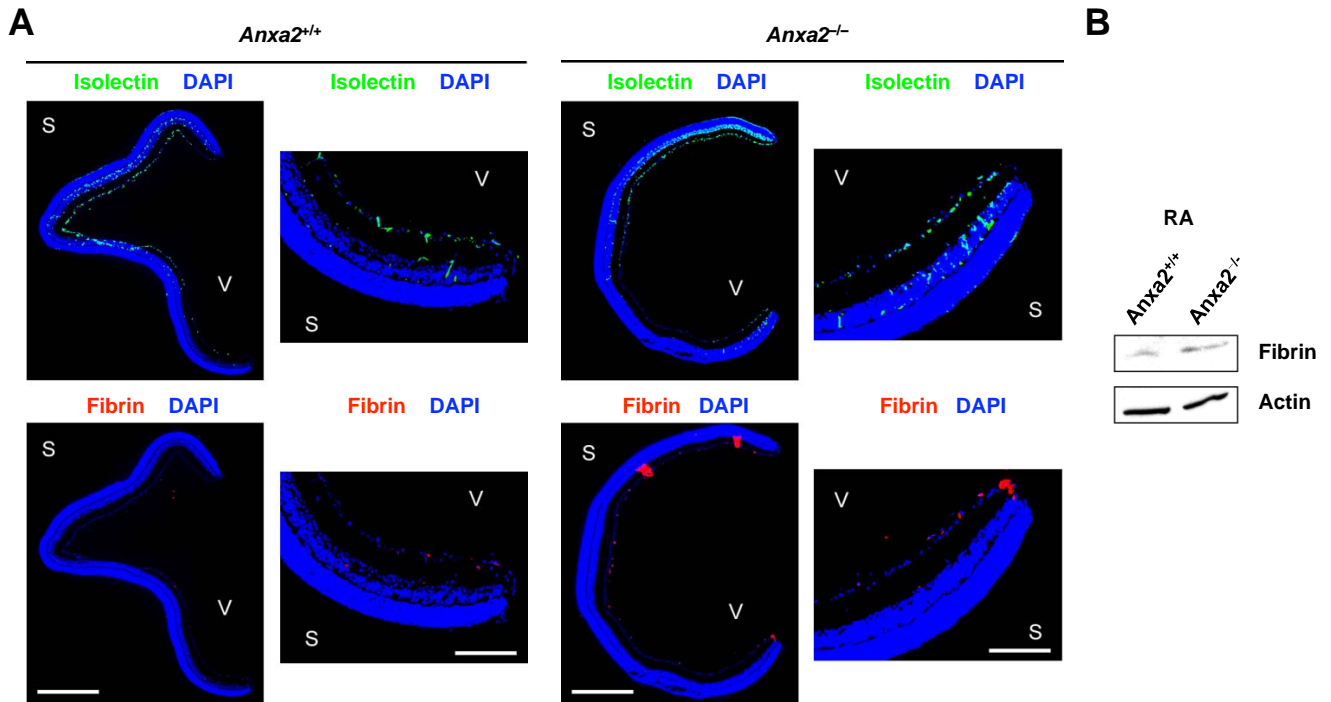

Figure S7

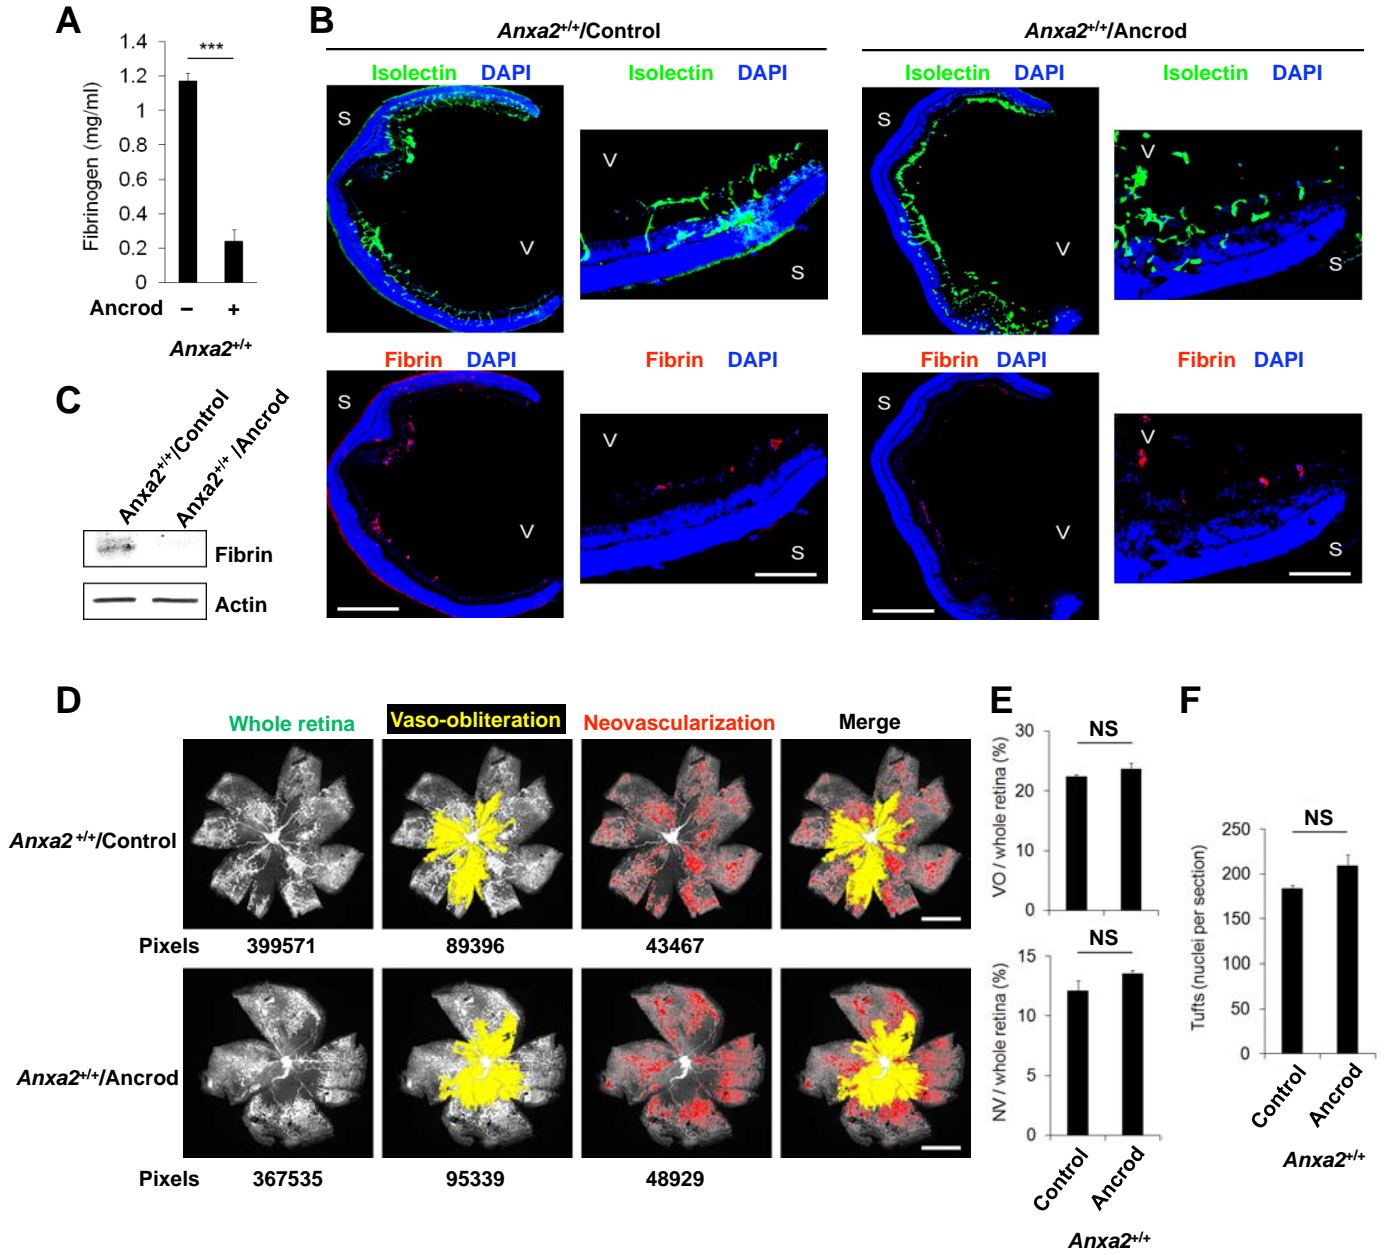



**Figure S8**

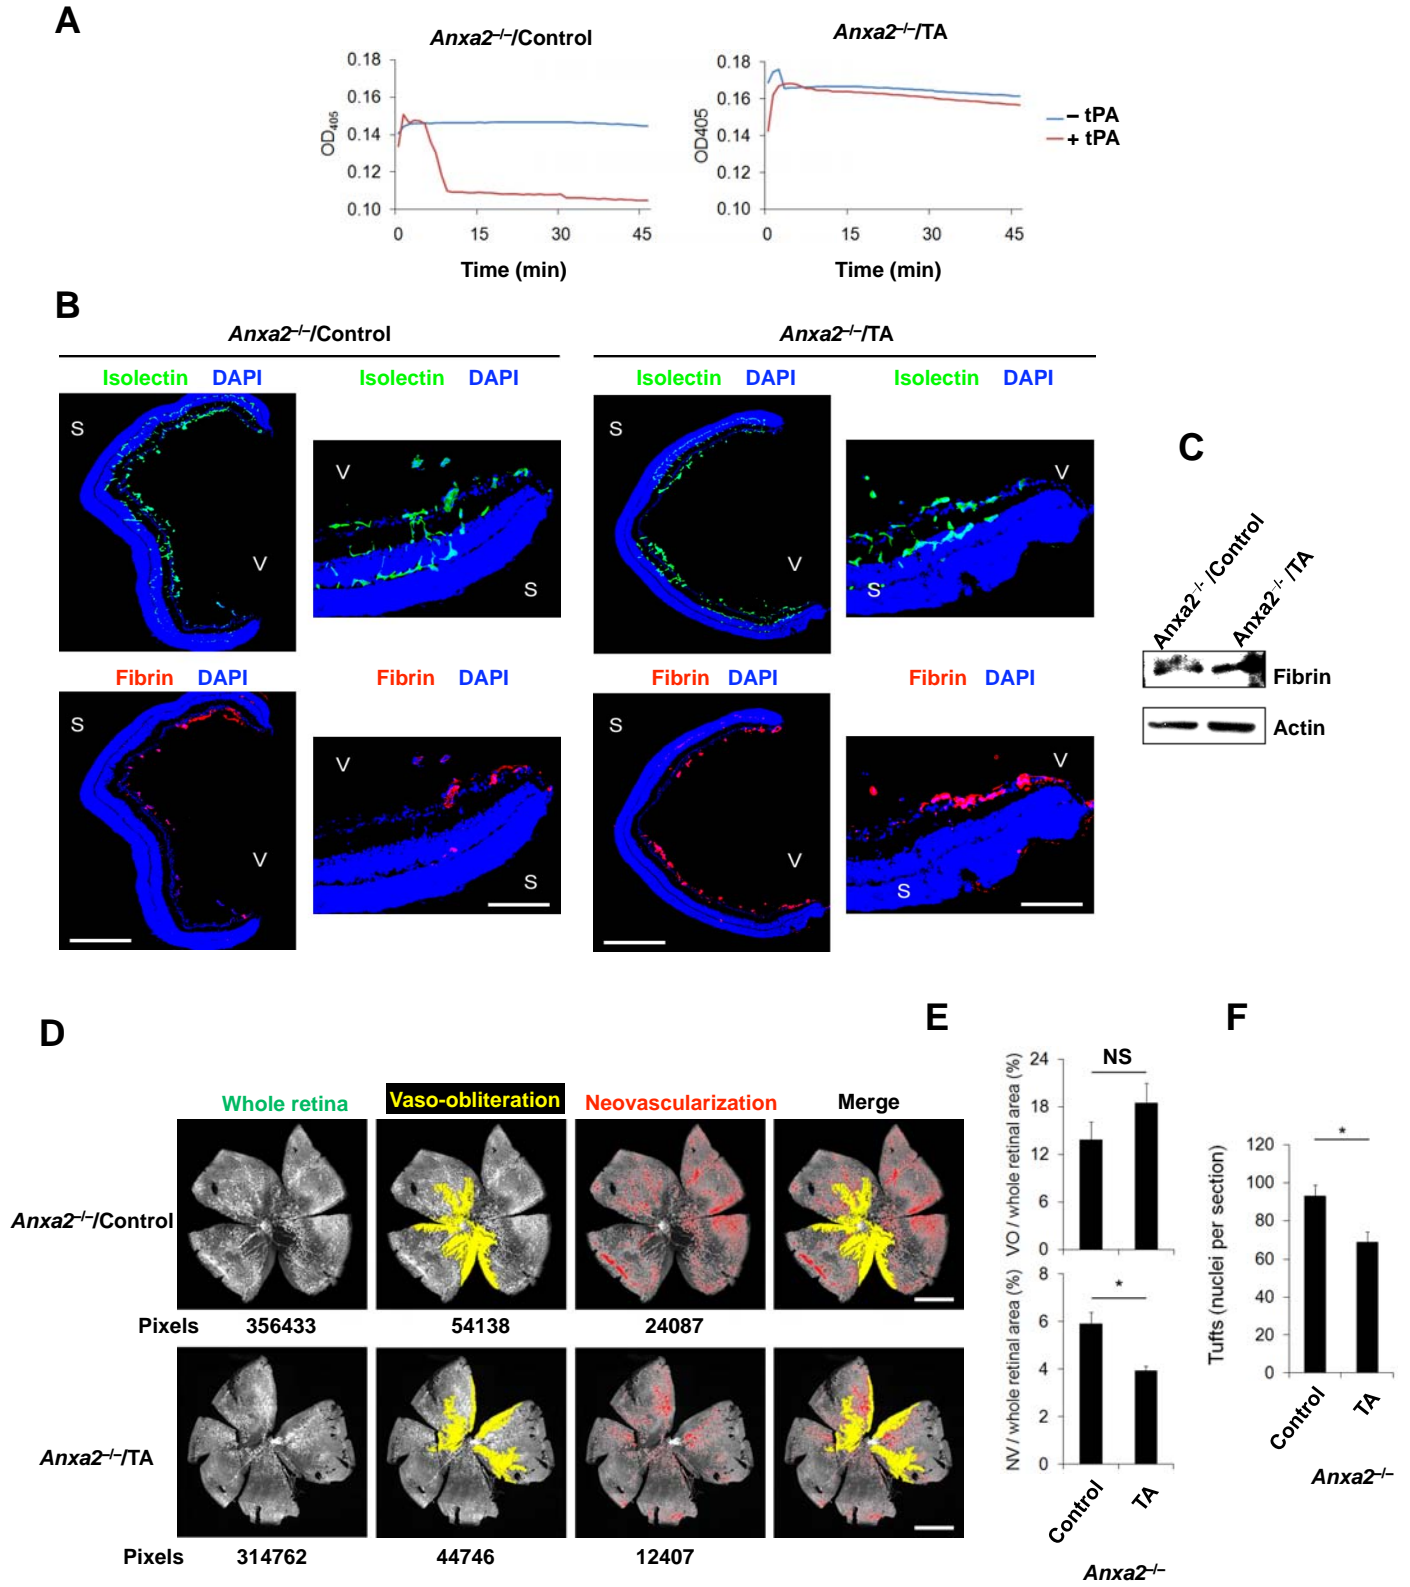

Figure S9

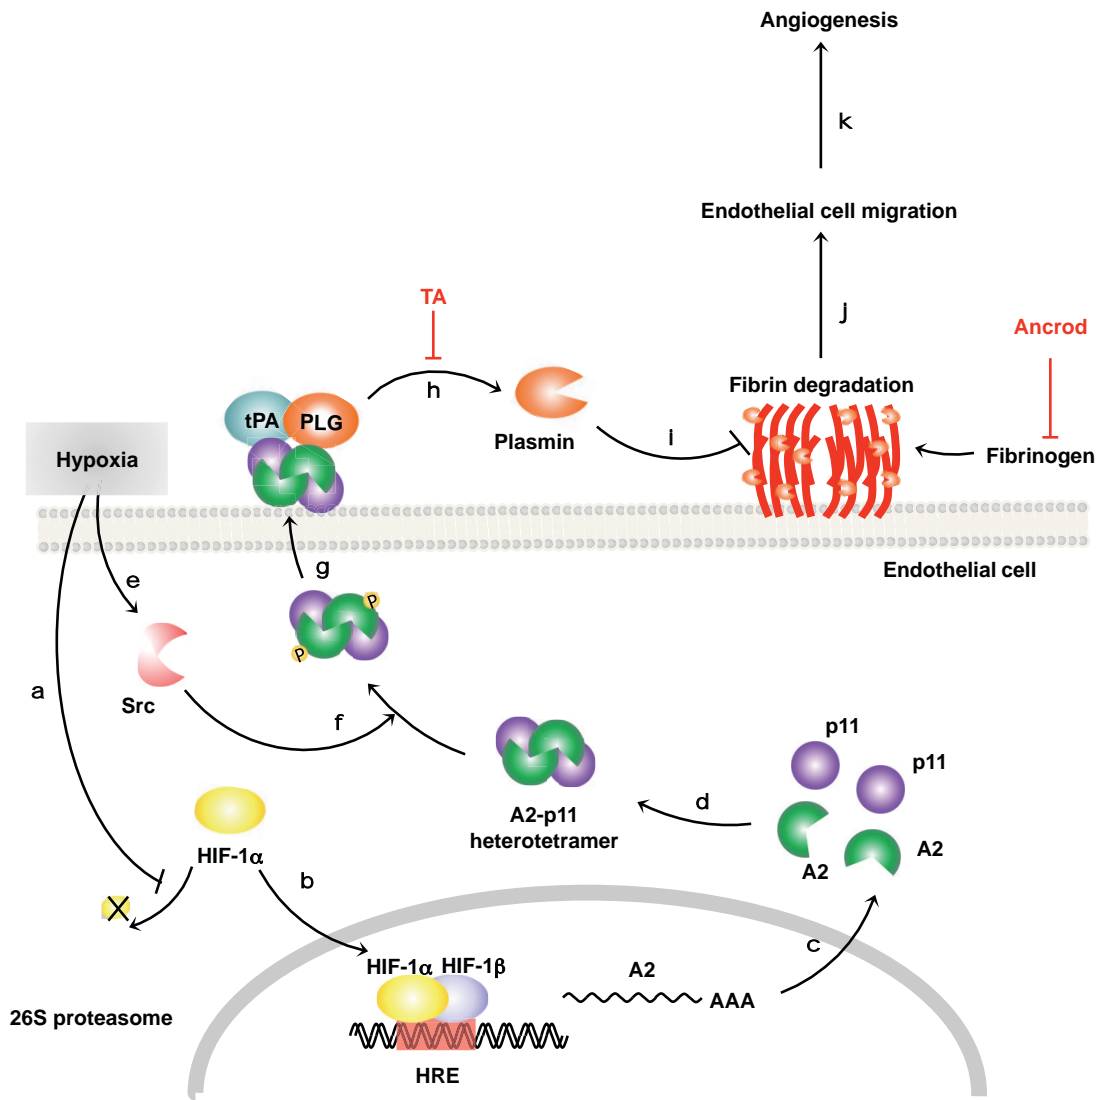

Supplement: supp_blood-2011-03-341214_Document1.pdf [file supp_blood-2011-03-341214_Document1.pdf]
